# Supplementary material for: LincRNA00612 inhibits apoptosis and inflammation in LPS-induced BEAS-2B cells via enhancing interaction between p-STAT3 and A2M promoter
Source: PeerJ. 2023 Mar 2;11:e14986. doi: 10.7717/peerj.14986 (PMC9985899; doi:10.7717/peerj.14986)
Supplement: Supplemental Information 1 [file peerj-11-14986-s001.xlsx]

## Sheet: LINC00612
Treatment	Bio rep	Tec rep	CT target	Average target	CT reference	Average reference	ΔCT tar-ref	Average ΔCT control	ΔΔCT	2^(-ΔΔCT)	Average 2^(-ΔΔCT)	STEDV 2^(-ΔΔCT)		Control	COPD
control		ⅰ	25.6439		20.2774									0.949548	0.455157
	32	ⅱ	25.5994	25.6156	20.2529	20.263	5.3526	5.27791	0.0746873	0.949548				1.51286	0.52942
		ⅲ	25.6035		20.2587									1.12857	0.538451
		ⅰ	26.1768		21.5196									0.84121	0.471252
	74	ⅱ	26.2017	26.1864	21.4965	21.5058	4.68063	5.27791	-0.597278	1.51286				0.788464	0.283145
		ⅲ	26.1807		21.5012									0.793746	0.521963
		ⅰ	24.6574		19.5636									0.607039	0.562398
	89	ⅱ	24.677	24.6794	19.5622	19.576	5.10341	5.27791	-0.174495	1.12857				0.921275	0.818287
		ⅲ	24.7038		19.6022									0.865058	0.647269
		ⅰ	23.7714		18.2528									1.20825	0.788273
	99	ⅱ	23.849	23.8058	18.2813	18.2785	5.52737	5.27791	0.249462	0.84121				0.937295	0.808046
		ⅲ	23.7971		18.3013									1.6357	0.699789
		ⅰ	33.2097		27.6018									1.21804	0.711446
	102	ⅱ	33.1991	33.2036	27.5674	27.5828	5.62079	5.27791	0.342883	0.788464				0.699628	0.853877
		ⅲ	33.202		27.5792									0.697573	0.488478
		ⅰ	33.7022		28.1429									0.680202	0.651315
	103	ⅱ	33.6948	33.6914	27.995	28.0802	5.61116	5.27791	0.333251	0.793746				0.416423	0.854455
		ⅲ	33.6772		28.1029									1.20042	0.21441
		ⅰ	24.5597		18.5994									1.4481	0.185011
	106	ⅱ	24.5975	24.589	18.571	18.5909	5.99805	5.27791	0.72014	0.607039				1.04494	0.114562
		ⅲ	24.6098		18.6025									1.55533	0.1748
		ⅰ	25.3078		19.9154									1.0695	0.210236
	107	ⅱ	25.2972	25.3021	19.9106	19.9059	5.39621	5.27791	0.118297	0.921275				1.28714	0.233094
		ⅲ	25.3012		19.8915									0.986302	0.212316
		ⅰ	25.7044		20.2371									1.08469	0.675509
	144	ⅱ	25.6702	25.7013	20.1984	20.2142	5.48704	5.27791	0.209132	0.865058				1.05502	0.275368
		ⅲ	25.7292		20.2073									1.06687	0.526685
		ⅰ	25.2797		20.267									1.05709	0.414925
	149	ⅱ	25.2928	25.2916	20.2915	20.2866	5.00498	5.27791	-0.272925	1.20825				1.29897	0.909444
		ⅲ	25.3023		20.3013									1.35814	0.576391
		ⅰ	24.8998		19.5443									1.03445	0.457736
	151	ⅱ	24.7612	24.8567	19.4543	19.4854	5.37133	5.27791	0.0934252	0.937295				0.781645	0.606251
		ⅲ	24.9092		19.4575									1.11321
		ⅰ	24.039		19.4077									0.987692
	152	ⅱ	23.9728	23.9696	19.4019	19.4016	4.568	5.27791	-0.709911	1.6357
		ⅲ	23.897		19.3952
		ⅰ	24.4694		19.476
	153	ⅱ	24.4694	24.4694	19.476	19.476	4.99335	5.27791	-0.284557	1.21804
		ⅲ	24.4694		19.476
		ⅰ	32.0325		26.241						1.03913	0.279669
	171	ⅱ	31.949	31.9981	26.1689	26.2048	5.79325	5.27791	0.515339	0.699628
		ⅲ	32.0127		26.2045
		ⅰ	31.4132		25.61
	174	ⅱ	31.3802	31.4012	25.5997	25.6037	5.79749	5.27791	0.519584	0.697573
		ⅲ	31.4101		25.6014
		ⅰ	31.7229		25.9255
	176	ⅱ	31.7037	31.6965	25.8699	25.8627	5.83387	5.27791	0.555965	0.680202
		ⅲ	31.663		25.7926
		ⅰ	24.8558		18.3652
	177	ⅱ	24.8835	24.8804	18.3154	18.3386	6.54179	5.27791	1.26388	0.416423
		ⅲ	24.9019		18.3352
		ⅰ	24.8418		19.8328
	187	ⅱ	24.7855	24.8096	19.7694	19.7952	5.01437	5.27791	-0.263539	1.20042
		ⅲ	24.8013		19.7834
		ⅰ	23.6212		18.9051
	189	ⅱ	23.594	23.6058	18.8904	18.862	4.74375	5.27791	-0.534157	1.4481
		ⅲ	23.6022		18.7906
		ⅰ	24.4483		19.2214
	190	ⅱ	24.3842	24.4112	19.1968	19.1967	5.21449	5.27791	-0.0634169	1.04494
		ⅲ	24.401		19.1719
		ⅰ	23.6607		19.0134
	192	ⅱ	23.5676	23.6108	18.9135	18.9701	4.64069	5.27791	-0.637217	1.55533
		ⅲ	23.6041		18.9834
		ⅰ	23.6264		18.4656
	193	ⅱ	23.5696	23.5996	18.4066	18.4186	5.18097	5.27791	-0.0969387	1.0695
		ⅲ	23.6027		18.3836
		ⅰ	23.6238		18.6853
	195	ⅱ	23.5623	23.5961	18.6604	18.6824	4.91374	5.27791	-0.364174	1.28714
		ⅲ	23.6023		18.7013
		ⅰ	28.4958		23.1993
	199	ⅱ	28.487	28.4948	23.1898	23.197	5.29781	5.27791	0.0198993	0.986302
		ⅲ	28.5018		23.202
		ⅰ	28.2282		23.0672
	203	ⅱ	28.2033	28.2047	23.0175	23.044	5.16063	5.27791	-0.117283	1.08469
		ⅲ	28.1825		23.0475
		ⅰ	28.3479		23.1497
	204	ⅱ	28.2893	28.3172	23.1035	23.1165	5.20064	5.27791	-0.0772684	1.05502
		ⅲ	28.3143		23.0965
		ⅰ	23.3391		18.1694
	210	ⅱ	23.3073	23.3124	18.1571	18.1279	5.18453	5.27791	-0.0933826	1.06687
		ⅲ	23.2907		18.0571
		ⅰ	23.2332		18.0603
	223	ⅱ	23.2013	23.2453	18.0256	18.0474	5.19781	5.27791	-0.0800996	1.05709
		ⅲ	23.3012		18.0565
		ⅰ	24.7069		19.8337
	229	ⅱ	24.6935	24.7009	19.7637	19.8003	4.90054	5.27791	-0.377366	1.29897
		ⅲ	24.7022		19.8036
		ⅰ	24.8544		20.0051
	237	ⅱ	24.8962	24.8707	20.1079	20.0344	4.83628	5.27791	-0.441627	1.35814
		ⅲ	24.8616		19.9902
		ⅰ	25.22		20.0018
	239	ⅱ	25.1743	25.1993	19.9181	19.9703	5.22905	5.27791	-0.048862	1.03445
		ⅲ	25.2037		19.991
		ⅰ	33.1812		27.5867
	247	ⅱ	33.1892	33.2172	27.4626	27.5839	5.63332	5.27791	0.355414	0.781645
		ⅲ	33.2812		27.7024
		ⅰ	32.8578		27.7132
	261	ⅱ	32.7979	32.8363	27.6353	27.7131	5.12318	5.27791	-0.154727	1.11321
		ⅲ	32.8532		27.7908
		ⅰ	28.5103		23.2211
	282	ⅱ	28.4751	28.4963	23.2053	23.2005	5.29578	5.27791	0.0178673	0.987692
		ⅲ	28.5034		23.1751
COPD		ⅰ	32.2153		25.7992
	23	ⅱ	32.1959	32.2038	25.7699	25.7903	6.41347	5.27791	1.13556	0.455157
		ⅲ	32.2002		25.8017
		ⅰ	33.7945		27.6037		6.2
	33	ⅱ	33.8112	33.7903	27.597	27.5949	6.19542	5.27791	0.917514	0.52942
		ⅲ	33.7652		27.584
		ⅰ	33.9211		27.6984
	38	ⅱ	33.6921	33.7753	27.6037	27.6042	6.17102	5.27791	0.893112	0.538451
		ⅲ	33.7125		27.5106
		ⅰ	31.812		25.4604
	55	ⅱ	31.8974	31.8457	25.4851	25.4823	6.36334	5.27791	1.08543	0.471252
		ⅲ	31.8276		25.5015
		ⅰ	35.078		27.9808
	59	ⅱ	35.086	35.095	28.0846	27.9967	7.0983	5.27791	1.82039	0.283145
		ⅲ	35.1211		27.9246
		ⅰ	28.8317		22.5959
	71	ⅱ	28.7865	28.8116	22.5892	22.5957	6.21589	5.27791	0.937981	0.521963
		ⅲ	28.8165		22.602
		ⅰ	28.92		22.8056
	93	ⅱ	28.892	28.9042	22.8016	22.7959	6.10825	5.27791	0.830336	0.562398
		ⅲ	28.9005		22.7805
		ⅰ	33.2448		27.658
	115	ⅱ	33.1872	33.2112	27.5726	27.6439	5.56723	5.27791	0.289321	0.818287
		ⅲ	33.2015		27.7012
		ⅰ	28.754		22.8742
	118	ⅱ	28.7276	28.7118	22.742	22.8063	5.90547	5.27791	0.627562	0.647269
		ⅲ	28.6538		22.8027
		ⅰ	33.2683		27.6791
	122	ⅱ	33.1927	33.2235	27.5268	27.6024	5.62114	5.27791	0.343232	0.788273
		ⅲ	33.2096		27.6013
		ⅰ	33.7432		28.1429
	133	ⅱ	33.7023	33.7055	28.0949	28.1201	5.5854	5.27791	0.307491	0.808046
		ⅲ	33.6709		28.1224
		ⅰ	31.3801		25.6095		5.8
	137	ⅱ	31.3781	31.3864	25.5974	25.5935	5.79292	5.27791	0.515008	0.699789
		ⅲ	31.401		25.5737
		ⅰ	31.678		25.8926		5.8
	138	ⅱ	31.702	31.6555	25.8651	25.8864	5.76908	5.27791	0.491174	0.711446
		ⅲ	31.5863		25.9015
		ⅰ	23.7921		18.2816		5.5				0.51468	0.231268
	142	ⅱ	23.8025	23.7915	18.3019	18.2857	5.50581	5.27791	0.227899	0.853877
		ⅲ	23.7799		18.2735
		ⅰ	31.8071		25.5041		6.4
	143	ⅱ	31.7984	31.8089	25.4874	25.4973	6.31155	5.27791	1.03364	0.488478
		ⅲ	31.8211		25.5004
		ⅰ	28.7055		22.7843		5.9
	188	ⅱ	28.673	28.6925	22.8023	22.796	5.89648	5.27791	0.618572	0.651315
		ⅲ	28.699		22.8015
		ⅰ	25.7002		20.2074		5.5
	226	ⅱ	25.6834	25.6961	20.1774	20.1912	5.50483	5.27791	0.226924	0.854455
		ⅲ	25.7045		20.1889
		ⅰ	34.7519		27.2732
	233	ⅱ	34.7634	34.7695	27.2638	27.2701	7.49947	5.27791	2.22156	0.21441
		ⅲ	34.7933		27.2732
		ⅰ	35.1494		27.4187
	234	ⅱ	35.0938	35.1159	27.4019	27.4036	7.71222	5.27791	2.43431	0.185011
		ⅲ	35.1044		27.3904
		ⅰ	34.071		25.6497
	245	ⅱ	33.9038	34.0235	25.5969	25.6198	8.4037	5.27791	3.12579	0.114562
		ⅲ	34.0957		25.6128
		ⅰ	35.1018		27.3334
	257	ⅱ	35.0968	35.1066	27.3108	27.3124	7.79414	5.27791	2.51623	0.1748
		ⅲ	35.121		27.293
		ⅰ	35.1097		27.5776
	259	ⅱ	35.0971	35.1093	27.608	27.5814	7.52783	5.27791	2.24992	0.210236
		ⅲ	35.121		27.5587
		ⅰ	35.1137		27.6998
	260	ⅱ	35.0116	35.0805	27.6899	27.7015	7.37893	5.27791	2.10102	0.233094
		ⅲ	35.1161		27.715
		ⅰ	33.206		25.6989
	264	ⅱ	33.2016	33.2012	25.6604	25.6876	7.51362	5.27791	2.23571	0.212316
		ⅲ	33.196		25.7035
		ⅰ	32.1026		26.1689		5.8
	271	ⅱ	31.9903	32.0351	26.1945	26.1913	5.84386	5.27791	0.565954	0.675509
		ⅲ	32.0125		26.2104
		ⅰ	35.1076		27.9928		7.1
	272	ⅱ	35.0741	35.108	28.0058	27.9695	7.13848	5.27791	1.86057	0.275368
		ⅲ	35.1422		27.9098
		ⅰ	28.7938		22.5996		6.2
	273	ⅱ	28.8027	28.7995	22.5892	22.5966	6.2029	5.27791	0.924988	0.526685
		ⅲ	28.8021		22.6011
		ⅰ	24.8253		18.3015		6.5
	277	ⅱ	24.8552	24.8606	18.2967	18.3136	6.54699	5.27791	1.26908	0.414925
		ⅲ	24.9014		18.3427
		ⅰ	25.3012		19.8915		5.4
	278	ⅱ	25.2998	25.2997	19.8615	19.8848	5.41485	5.27791	0.136943	0.909444
		ⅲ	25.2981		19.9015
		ⅰ	28.9005		22.8017		6.1
	289	ⅱ	28.8976	28.8627	22.7816	22.7899	6.07279	5.27791	0.794881	0.576391
		ⅲ	28.7901		22.7864
		ⅰ	32.1903		25.7742		6.4
	290	ⅱ	32.1991	32.197	25.7995	25.7916	6.40532	5.27791	1.12741	0.457736
		ⅲ	32.2015		25.8012
		ⅰ	24.5997		18.58		6
	291	ⅱ	24.6018	24.5925	18.5967	18.5925	5.99992	5.27791	0.722013	0.606251
		ⅲ	24.576		18.6009

## Sheet: A2M
Treatment	Bio rep	Tec Rep	CT Target	Average target	CT reference	Average reference	ΔCT tar-ref	Average ΔCT control	ΔΔCT	2^(-ΔΔCT)	Average 2^(-ΔΔCT)	STEDV 2^(-ΔΔCT)		Control	COPD
control	32	ⅰ	26.0641		21.4572			4.57732						0.983763	0.199874
		ⅱ	25.9932	26.0213	21.4057	21.4203	4.60094	4.57732	0.0236172	0.983763				1.43034	0.25532
		ⅲ	26.0064		21.398									0.788261	0.227026
	74	ⅰ	26.6855		22.5959									1.02026	0.38915
		ⅱ	26.5854	26.66	22.606	22.599	4.06096	4.57732	-0.516362	1.43034				1.20145	0.602408
		ⅲ	26.7091		22.5953									0.650686	0.532723
	89	ⅰ	26.1599		21.2653									0.669683	0.638158
		ⅱ	26.0986	26.1395	21.183	21.2189	4.92057	4.57732	0.343254	0.788261				1.26279	1.11379
		ⅲ	26.1599		21.2084									0.745863	0.261918
	99	ⅰ	19.3849		14.9074									0.984471	0.951099
		ⅱ	19.4119	19.3998	14.877	14.8514	4.54838	4.57732	-0.0289374	1.02026				0.80183	0.79589
		ⅲ	19.4027		14.7699									1.44674	0.998731
	102	ⅰ	19.6219		15.368									0.927935	0.972033
		ⅱ	19.5836	19.6957	15.4012	15.3831	4.31254	4.57732	-0.264777	1.20145				0.603464	0.904653
		ⅲ	19.8815		15.3801									0.440703	0.299786
	103	ⅰ	19.4341		14.2269									0.854836	0.614894
		ⅱ	19.4065	19.409	14.1935	14.2117	5.19728	4.57732	0.619966	0.650686				0.853348	0.729902
		ⅲ	19.3865		14.2148									1.50188	0.304019
	106	ⅰ	33.2313		28.0808									1.8531	0.570295
		ⅱ	33.1952	33.212	28.0101	28.0562	5.15577	4.57732	0.578449	0.669683				0.923542	0.198024
		ⅲ	33.2095		28.0778									2.3251	0.172176
	107	ⅰ	32.2146		27.9789									0.571098	0.422682
		ⅱ	32.1821	32.1997	28.0118	27.959	4.2407	4.57732	-0.336618	1.26279				0.958575	0.474982
		ⅲ	32.2023		27.8863									0.909691	0.480348
	144	ⅰ	32.5021		27.5465									0.855102	0.431987
		ⅱ	32.4852	32.5034	27.4783	27.503	5.00034	4.57732	0.423018	0.745863				1.08256	0.457118
		ⅲ	32.5229		27.4844									0.983885	0.693023
	149	ⅰ	21.3431		16.7463									0.925462	0.40211
		ⅱ	21.302	21.3143	16.6928	16.7144	4.5999	4.57732	0.0225792	0.984471				1.73416	0.98807
		ⅲ	21.2977		16.704									1.48357	0.691978
	151	ⅰ	21.6686		16.7997									1.21897	0.708799
		ⅱ	21.7089	21.6895	16.808	16.7936	4.89595	4.57732	0.318632	0.80183				1.20533	0.723692
		ⅲ	21.6911		16.7731									0.804178
	152	ⅰ	27.2698		23.2211									1.14304
		ⅱ	27.3017	27.2899	23.3075	23.2454	4.04451	4.57732	-0.53281	1.44674
		ⅲ	27.2981		23.2075
	153	ⅰ	25.5799		20.9189
		ⅱ	25.5827	25.5913	20.8938	20.906	4.68522	4.57732	0.107904	0.927935
		ⅲ	25.6112		20.9054
	171	ⅰ	19.7455		14.4124						1.06311	0.394975
		ⅱ	19.6745	19.7075	14.3911	14.4015	5.30598	4.57732	0.72866	0.603464
		ⅲ	19.7025		14.4011
	174	ⅰ	25.8152		20.0564
		ⅱ	25.8059	25.8121	20.1001	20.0527	5.75944	4.57732	1.18212	0.440703
		ⅲ	25.8152		20.0014
	176	ⅰ	25.9322		21.1198
		ⅱ	25.8932	25.9104	21.098	21.1068	4.8036	4.57732	0.22628	0.854836
		ⅲ	25.9057		21.1025
	177	ⅰ	21.6467		16.8209
		ⅱ	21.6047	21.6111	16.8003	16.8049	4.80611	4.57732	0.228793	0.853348
		ⅲ	21.5818		16.7936
	187	ⅰ	26.7703		22.8056
		ⅱ	26.8023	26.7899	22.7806	22.7993	3.99055	4.57732	-0.586773	1.50188
		ⅲ	26.797		22.8117
	189	ⅰ	21.8817		18.1774
		ⅱ	21.8717	21.885	18.2177	18.1976	3.68738	4.57732	-0.889943	1.8531
		ⅲ	21.9017		18.1977
	190	ⅰ	19.6168		14.9397
		ⅱ	19.5933	19.6039	14.894	14.9118	4.69207	4.57732	0.114751	0.923542
		ⅲ	19.6017		14.9018
	192	ⅰ	24.4411		21.0511
		ⅱ	24.4065	24.4141	20.9981	21.0541	3.36003	4.57732	-1.21729	2.3251
		ⅲ	24.3947		21.113
	193	ⅰ	33.9748		28.6062
		ⅱ	33.9697	33.9871	28.6018	28.6016	5.38551	4.57732	0.80819	0.571098
		ⅲ	34.0168		28.5968
	195	ⅰ	32.967		28.3241
		ⅱ	32.9825	32.9874	28.3919	28.3491	4.63836	4.57732	0.061037	0.958575
		ⅲ	33.0128		28.3312
	199	ⅰ	20.3492		15.619
		ⅱ	20.3117	20.3176	15.6019	15.6037	4.71387	4.57732	0.136551	0.909691
		ⅲ	20.2917		15.5902
	203	ⅰ	20.2169		15.4046
		ⅱ	20.193	20.2047	15.3896	15.4016	4.80315	4.57732	0.225832	0.855102
		ⅲ	20.2042		15.4105
	204	ⅰ	23.0356		18.5174
		ⅱ	22.8428	22.9687	18.4963	18.5058	4.46287	4.57732	-0.114446	1.08256
		ⅲ	23.0277		18.5039
	210	ⅰ	23.6048		19.0483
		ⅱ	23.6016	23.6001	18.9326	18.9994	4.60076	4.57732	0.0234389	0.983885
		ⅲ	23.594		19.0172
	223	ⅰ	23.2633		18.5973
		ⅱ	23.302	23.2828	18.5823	18.5937	4.68907	4.57732	0.111754	0.925462
		ⅲ	23.283		18.6016
	229	ⅰ	23.1831		19.4229
		ⅱ	23.2183	23.1902	19.4054	19.4071	3.78308	4.57732	-0.794238	1.73416
		ⅲ	23.1691		19.393
	237	ⅰ	23.392		19.3582
		ⅱ	23.3892	23.3938	19.3946	19.3856	4.00825	4.57732	-0.569072	1.48357
		ⅲ	23.4002		19.4039
	239	ⅰ	23.4774		19.2088
		ⅱ	23.4931	23.4911	19.2019	19.1995	4.29165	4.57732	-0.285668	1.21897
		ⅲ	23.5029		19.1877
	247	ⅰ	19.436		15.1083
		ⅱ	19.3807	19.4078	15.083	15.0999	4.30789	4.57732	-0.269431	1.20533
		ⅲ	19.4066		15.1083
	261	ⅰ	22.7863		17.9195
		ⅱ	22.7911	22.7962	17.902	17.9045	4.89173	4.57732	0.314413	0.804178
		ⅲ	22.8112		17.892
	282	ⅰ	22.4959		18.1356
		ⅱ	22.486	22.4946	18.0912	18.1101	4.38444	4.57732	-0.192875	1.14304
		ⅲ	22.5019		18.1036
COPD	23	ⅰ	32.541		25.6497
		ⅱ	32.4981	32.5173	25.605	25.6172	6.90016	4.57732	2.32284	0.199874
		ⅲ	32.5129		25.5969
	33	ⅰ	32.1509		25.6477
		ⅱ	32.2151	32.1937	25.6588	25.6468	6.54694	4.57732	1.96962	0.25532
		ⅲ	32.2151		25.6337
	38	ⅰ	32.5307		25.7992
		ⅱ	32.5016	32.5092	25.7774	25.7928	6.71639	4.57732	2.13907	0.227026
		ⅲ	32.4953		25.8017
	55	ⅰ	22.549		16.601
		ⅱ	22.5468	22.5329	16.5983	16.594	5.93892	4.57732	1.3616	0.38915
		ⅲ	22.503		16.5827
	59	ⅰ	20.7826		15.4605
		ⅱ	20.8051	20.7931	15.4888	15.4846	5.3085	4.57732	0.731186	0.602408
		ⅲ	20.7917		15.5047
	71	ⅰ	21.0291		15.5429
		ⅱ	20.9705	21.0056	15.4967	15.5198	5.48586	4.57732	0.908541	0.532723
		ⅲ	21.0172		15.5197
	93	ⅰ	21.6786		16.449
		ⅱ	21.693	21.6832	16.4359	16.4578	5.22533	4.57732	0.648016	0.638158
		ⅲ	21.6779		16.4886
	115	ⅰ	31.0843		26.6352
		ⅱ	31.0044	31.0558	26.6704	26.6339	4.42185	4.57732	-0.155472	1.11379
		ⅲ	31.0786		26.5962
	118	ⅰ	22.8462		16.3932
		ⅱ	22.7918	22.8182	16.308	16.3677	6.51013	4.57732	1.93281	0.261918
		ⅲ	22.8165		16.4018
	122	ⅰ	22.6603		18.0425
		ⅱ	22.7045	22.6858	17.958	18.0362	4.64965	4.57732	0.0723325	0.951099
		ⅲ	22.6926		18.108
	133	ⅰ	22.828		17.9128
		ⅱ	22.7976	22.8091	17.9032	17.9024	4.90668	4.57732	0.329359	0.79589
		ⅲ	22.8018		17.8912
	137	ⅰ	19.4872		14.8626
		ⅱ	19.5017	19.4932	14.989	14.914	4.57915	4.57732	0.00183176	0.998731
		ⅲ	19.4907		14.8904
	138	ⅰ	20.3513		15.7308
		ⅱ	20.3013	20.3262	15.6916	15.708	4.61824	4.57732	0.0409226	0.972033
		ⅲ	20.326		15.7016
	142	ⅰ	20.7822		16.0415						0.568958	0.269535
		ⅱ	20.7901	20.7912	16.0622	16.0694	4.72188	4.57732	0.144564	0.904653
		ⅲ	20.8014		16.1044
	143	ⅰ	22.1402		15.7945
		ⅱ	22.0997	22.1137	15.7995	15.7984	6.31531	4.57732	1.73799	0.299786
		ⅲ	22.1013		15.8012
	188	ⅰ	20.961		15.682
		ⅱ	20.858	20.9739	15.6995	15.695	5.27891	4.57732	0.701591	0.614894
		ⅲ	21.1027		15.7035
	226	ⅰ	21.7953		16.7465
		ⅱ	21.802	21.7914	16.7239	16.7598	5.03154	4.57732	0.454225	0.729902
		ⅲ	21.7768		16.8092
	233	ⅰ	23.2943		17.0381
		ⅱ	23.2919	23.2993	17.0364	17.0042	6.29508	4.57732	1.71777	0.304019
		ⅲ	23.3116		16.9381
	234	ⅰ	32.7757		27.4133
		ⅱ	32.8013	32.7901	27.4012	27.4026	5.38754	4.57732	0.810219	0.570295
		ⅲ	32.7933		27.3932
	245	ⅰ	33.7868		26.8572
		ⅱ	33.8053	33.7985	26.8789	26.8849	6.91357	4.57732	2.33625	0.198024
		ⅲ	33.8033		26.9186
	257	ⅰ	34.0443		26.9123
		ⅱ	33.9951	34.017	26.8913	26.9016	7.11536	4.57732	2.53804	0.172176
		ⅲ	34.0115		26.9013
	259	ⅰ	26.8291		21.0237
		ⅱ	26.8446	26.8218	21.0123	21.0021	5.81967	4.57732	1.24236	0.422682
		ⅲ	26.7915		20.9702
	260	ⅰ	31.7264		26.0544
		ⅱ	31.693	31.7072	26.0831	26.0558	5.65137	4.57732	1.07406	0.474982
		ⅲ	31.7023		26.0301
	264	ⅰ	21.9815		16.3414
		ⅱ	21.9998	21.9513	16.3074	16.3162	5.63517	4.57732	1.05785	0.480348
		ⅲ	21.8727		16.2997
	271	ⅰ	22.1687		16.3945
		ⅱ	22.2072	22.1909	16.4139	16.4027	5.78826	4.57732	1.21094	0.431987
		ⅲ	22.1969		16.3995
	272	ⅰ	20.0933		14.379
		ⅱ	20.1029	20.0966	14.402	14.3899	5.70668	4.57732	1.12936	0.457118
		ⅲ	20.0935		14.3887
	273	ⅰ	22.7467		17.6369
		ⅱ	22.7095	22.7178	17.6087	17.6114	5.10634	4.57732	0.529024	0.693023
		ⅲ	22.6971		17.5886
	277	ⅰ	26.7183		20.8266
		ⅱ	26.7018	26.7011	20.8049	20.8094	5.89166	4.57732	1.31434	0.40211
		ⅲ	26.6832		20.7968
	278	ⅰ	30.6865		26.0949
		ⅱ	30.6979	30.6958	26.099	26.1011	4.59463	4.57732	0.017315	0.98807
		ⅲ	30.703		26.1095
	289	ⅰ	22.8057		17.6739
		ⅱ	22.8018	22.7274	17.5804	17.6189	5.10852	4.57732	0.531203	0.691978
		ⅲ	22.5748		17.6024
	290	ⅰ	22.9531		17.8824
		ⅱ	22.6929	22.8937	17.7536	17.8199	5.07387	4.57732	0.496552	0.708799
		ⅲ	23.0352		17.8236
	291	ⅰ	22.9727		17.9688
		ⅱ	22.8069	22.8231	17.588	17.7792	5.04387	4.57732	0.466552	0.723692
		ⅲ	22.6897		17.781
