# Supplementary material for: LincRNA00612 inhibits apoptosis and inflammation in LPS-induced BEAS-2B cells via enhancing interaction between p-STAT3 and A2M promoter
Source: PeerJ. 2023 Mar 2;11:e14986. doi: 10.7717/peerj.14986 (PMC9985899; doi:10.7717/peerj.14986)
Supplement: Supplemental Information 2 [file peerj-11-14986-s002.xlsx]

## Sheet: Sheet1
treatment	biological replicates	CT tareget(average)	CT reference(average)	∆Ct	∆∆Ct	2^(-ΔΔCT)	AVERAGE	SD	p
silinc00612	group	linc00612	actin	∆Ct	∆∆Ct	2^(-ΔΔCT)	AVERAGE	SD	p
	silinc00612-1	35.0737	13.1857	21.8879	1.46027	0.363425	0.480563	0.103071	0.013
	silinc00612-1	33.9682	13.1025	20.8657	0.843285	0.557373
	silinc00612-1	34.906	13.2463	21.6597	0.940948	0.520891
	silinc00612-2	34.6611	10.2826	24.3786	3.95087	0.064665	0.363701	0.329741	0.029
	silinc00612-2	33.7486	13.2469	20.5017	0.479286	0.717332
	silinc00612-2	34.9253	12.5127	22.4126	1.69383	0.309106
	NC	32.1632	11.7355	20.4277		1	1
	NC	32.6768	12.6544	20.0224		1
	NC	32.9446	12.2258	20.7188		1
siA2M	group	linc00612	actin	∆Ct	∆∆Ct	2^(-ΔΔCT)	AVERAGE	SD	p
	NC	29.8335	12.3295	17.504		1
	NC	29.9941	12.2967	17.6974		1
	NC	30.3739	12.7134	17.6605		1
	siA2M-1	29.505	11.4579	18.0471	0.543111	0.68629	0.695857	0.0782733	0.003
	siA2M-1	29.3058	11.2472	18.0587	0.361279	0.778474
	siA2M-1	29.8035	11.4599	18.3436	0.683144	0.622807
	siA2M-2	34.858	12.5915	22.2665	4.76245	0.0368433	0.122628	0.177456	0.013
	siA2M-2	37.8967	12.3591	25.5376	7.84022	0.00436374
	siA2M-2	31.8059	12.5314	19.2745	1.61406	0.326677
silinc00612-2	A2M	actin	∆Ct	∆∆Ct	2^(-ΔΔCT)	AVERAGE	SD	p
	36.6903	12.5235	24.1668	2.10776	0.232006	0.317139	0.120933	0.01
	35.1269	13.2469	21.88	1.92224	0.263844
	34.5389	12.5127	22.0262	1.13427	0.455565
	NC	actin
	34.4896	12.4306	22.059		1	1
	32.6121	12.6544	19.9577		1
	33.1178	12.2258	20.892		1
linc00612 overexpression	linc00612	actin	∆Ct	∆∆Ct	2^(-ΔΔCT)	AVERAGE	SD	p
	28.2411	11.5337	16.7074	-5.25433	38.1689	52.0113	18.2997	0.04
	28.0495	11.6148	16.4347	-5.49525	45.1061
	28.0545	11.5733	16.4812	-6.18505	72.7589
	NC	actin
	34.0947	12.1329	21.9618		1	1
	34.1084	12.1785	21.93		1
	34.8708	12.2045	22.6663		1
linc00612 overexpression	A2M	actin
	34.8836	15.9491	18.9345	-2.10871	4.31305	4.77011	0.612277	0.009
	35.9912	15.7222	20.2689	-2.17999	4.53152
	35.5552	13.6046	21.9506	-2.45042	5.46576
	NC	actin
	33.7179	12.6747	21.0432		1	1
	36.493	14.0441	22.4489		1
	35.105	10.704	24.401		1
group	A2M	actin	∆Ct	∆∆Ct	2^(-ΔΔCT)	AVERAGE	SD	p
LINC00612	34.8836	15.9491	18.9345	-2.10871	4.31305	4.77011	0.612277	0.009
lINC00612	35.9912	15.7222	20.2689	-2.17999	4.53152
LINC00612	35.5552	13.6046	21.9506	-2.45042	5.46576
NC	33.7179	12.6747	21.0432		1	1
NC	36.493	14.0441	22.4489		1
NC	35.105	10.704	24.401		1
LINC+siA2M	36.8666	15.2993	21.5674	0.524179	0.695355	1.12524	0.378929
LINC+siA2M	36.3313	14.3789	21.9524	-0.496501	1.41079
LINC+siA2M	36.7061	12.6495	24.0567	-0.344357	1.26959
group	A2M	actin	∆Ct	∆∆Ct	2^(-ΔΔCT)	AVERAGE
linc00612	34.8836	15.9491	18.9345	-2.10871	4.31305	4.77011
linc00612	35.9912	15.7222	20.2689	-2.17999	4.53152
linc00612	35.5552	13.6046	21.9506	-2.45042	5.46576
NC	33.7179	12.6747	21.0432		1	1
NC	36.493	14.0441	22.4489		1
NC	35.105	10.704	24.401		1
linc00612+siA2M	36.3313	15.2993	21.032	-0.0111418	1.00775	1.14019
linc00612+siA2M	36.6347	14.3789	22.2558	-0.193116	1.14323
linc00612+siA2M	36.7061	12.6495	24.0567	-0.344357	1.26959
LPS concentration gradient	group	linc00612	actin	∆Ct	∆∆Ct	2^(-ΔΔCT)	AVERAGE	p
	1	35.0517	13.0518	21.9999	0.778518	0.582965	0.710492	0.0699
	1	33.5592	12.863	20.6962	0.48144	0.716263
	1	33.541	11.4131	22.1279	0.264916	0.832247
	5	36.2332	12.3301	23.9031	2.68175	0.155852	0.253187	0.0004
	5	34.9256	12.3904	22.5351	2.32036	0.200218
	5	35.1501	11.9778	23.1724	1.30939	0.403492
	10	35.7933	11.5548	24.2385	3.01713	0.123525	0.174368	0.0002
	10	39.5011	12.4639	27.0372	6.82239	0.008836
	10	35.0906	11.8719	23.2187	1.35571	0.390743
	NC	33.2062	11.9849	21.2214		1	1
	NC	32.1608	11.9461	20.2148		1
	NC	34.086	12.2231	21.863		1
10ugLPS		A2M	actin	∆Ct	∆∆Ct	2^(-ΔΔCT)	AVERAGE	p
	lps	23.1771	13.2072	9.96996	1.33837	0.395467	0.336737	0.009
	lps	22.9988	13.2332	9.76563	1.29399	0.407822
	lps	23.6669	13.3129	10.3541	2.27285	0.206921
	nc	21.8487	13.2171	8.63159		1	1
	nc	21.735	13.2634	8.47164		1
	nc	21.4201	13.3389	8.08121		1
	nuclear	ACTIN	13.0281		cytoplasm%(actin)	0.789952
	nuclear	ACTIN	13.3032			0.827324
	nuclear	ACTIN	12.8207			0.813733
	cytoplasm	ACTIN	11.1171		nuclear%(actin)	0.210048
	cytoplasm	ACTIN	11.0428			0.172676
	cytoplasm	ACTIN	10.6935			0.186267
	cytoplasm	U6	12.6487		nuclear%(U6)	0.62772
	cytoplasm	U6	13.0115			0.782292
	cytoplasm	U6	13.1916			0.803017
	nuclear	U6	11.895		cytoplasm%(U6)	0.37228
	nuclear	U6	11.1662			0.217708
	nuclear	U6	11.1642			0.196983
	cytoplasm	linc00612	34.719		nuclear%(linc00612)	0.0864797	0.193456
	cytoplasm	linc00612	34.202			0.292985
	cytoplasm	linc00612	33.9655			0.200903
	nuclear	linc00612	38.12		cytoplasm%(linc00612)	0.91352	0.806544
	nuclear	linc00612	35.4729			0.707015
	nuclear	linc00612	35.9574			0.799097
RAP assay
	INPUT	A2M	31.5584		Input%(RAP)	0.0727767	25.3025
	INPUT	A2M	31.9461			0.0511848	13.6016
	INPUT	A2M	32.0796			0.148506	35.9773
	RAP	A2M	35.3388		Input%(NC)	0.00287627	1
	RAP	A2M	36.2343			0.00376313	1
	RAP	A2M	34.831			0.00412776	1
	NC	A2M	Undetermined	40
	NC	A2M	Undetermined	40
	NC	A2M	Undetermined	40
	STAT3	actin	∆Ct	∆∆Ct	2^(-ΔΔCT)	AVERAGE	SD	p
NC	24.7917	16.2315	8.5602		1	1
NC	24.3154	15.1234	9.19196		1
NC	24.4378	15.6748	8.76305		1
siSTAT3-1	22.0229	12.8707	9.15219	0.591994	0.663425	0.634645	0.0882178	0.019
siSTAT3-1	22.7952	12.7025	10.0926	0.900689	0.535631
siSTAT3-1	21.9227	12.6551	9.26761	0.504555	0.704878
siSTAT3-2	22.7819	12.4492	10.3327	1.7725	0.292702	0.390658	0.104945	0.001
siSTAT3-2	22.4621	12.2742	10.1879	0.995916	0.501417
siSTAT3-2	22.5775	12.4104	10.1672	1.4041	0.377854
	A2M	actin	∆Ct	∆∆Ct	2^(-ΔΔCT)	AVERAGE	SD	p
siSTAT3-2	33.9854	13.5762	20.4092	4.32727	0.0498152	0.227337	0.258159	0.035
siSTAT3-2	32.3031	13.7354	18.5677	3.20147	0.108708
siSTAT3-2	32.2503	13.4825	18.7678	0.93377	0.523489
NC	32.2998	16.2178	16.082		1
NC	31.1515	15.7852	15.3662		1
NC	31.7256	13.8916	17.834		1
CHIP		CT	ΔCT	RQ（2-ΔCT）	%Input recovery
10%Input	primer1	23.8151
11%Input		23.8129
12%Input		23.7901
100%Input		20.4932
100%Input		20.491
100%Input		20.4682
IP		24.1658	3.67262	0.0784208	7.84208
IP		24.1704	3.67943	0.0780516	7.80516
IP		24.1026	3.63441	0.0805258	8.05258
IGG		27.6878	7.19459	0.00682674	0.682674
IGG		27.9019	7.41085	0.0058764	0.58764
IGG		27.8061	7.33788	0.00618125	0.618125
10%Input	primer2	24.2127
11%Input		24.3294
12%Input		24.3633
100%Input		20.8908
100%Input		21.0074
100%Input		21.0414
IP		24.7124	3.82157	0.0707281	7.07281
IP		24.3591	3.35165	0.097961	9.7961
IP		24.2668	3.22546	0.106915	10.6915
IGG		29.6254	8.73458	0.00234762	0.234762
IGG		28.9714	7.96399	0.00400497	0.400497
IGG		29.4726	8.43122	0.002897	0.2897
10%Input	primer3	22.8474
11%Input		22.8136
12%Input		22.5457
100%Input		19.5254
100%Input		19.4916
100%Input		19.2238
IP		23.068	3.54261	0.085816	8.5816
IP		22.9945	3.50284	0.0882143	8.82143
IP		23.5196	4.29583	0.0509129	5.09129
IGG		27.5518	8.02637	0.00383549	0.383549
IGG		27.8905	8.39889	0.00296266	0.296266
IGG		27.9428	8.71906	0.00237302	0.237302
CHIP
silinc00612	primer2	∆Ct	2-∆Ct	INPUT%
INPUT	21.9496
INPUT	22.0237
INPUT	21.9713
IP	26.672	4.72235	0.0378817	3.78817
IP	26.4504	4.42668	0.0464983	4.64983
IP	26.6436	4.67231	0.0392189	3.92189
IgG	29.4564	7.50671	0.00549864	0.549864
IgG	29.3918	7.36811	0.00605309	0.605309
IgG	28.9415	6.97024	0.00797531	0.797531
NC	primer2
INPUT	20.985
INPUT	21.2083
INPUT	20.6408
IP	23.9501	2.96508	0.128062	12.8062
IP	23.8397	2.63136	0.161392	16.1392
IP	23.8479	3.20716	0.10828	10.828
IgG	29.2532	8.26814	0.00324372	0.324372
IgG	29.5481	8.33979	0.00308656	0.308656
IgG	29.7355	9.09479	0.00182892	0.182892
