# Supplementary material for: LincRNA00612 inhibits apoptosis and inflammation in LPS-induced BEAS-2B cells via enhancing interaction between p-STAT3 and A2M promoter
Source: PeerJ. 2023 Mar 2;11:e14986. doi: 10.7717/peerj.14986 (PMC9985899; doi:10.7717/peerj.14986)
Supplement: Supplemental Information 3 [file peerj-11-14986-s003.xls]

## Sheet: Sheet1
	vector	LPS+vector	LPS+LINC00612	LPS+LINC00612+siA2M				vector	LPS+vector	LPS+LINC00612
repeat1	0.694	0.431	0.497	0.413			repeat1	2.58167	1.725	2.49333
repeat2	0.654	0.412	0.469	0.351			repeat2	2.4035	1.25575	2.03625
repeat3	0.741	0.437	0.618	0.446			repeat3	2.406	1.2445	2.0325
repeat1	1	0.621037	0.716138	0.595101			repeat1	1	0.668173	0.965784
repeat2	1	0.629969	0.717125	0.536697			repeat2	1	0.522467	0.847202
repeat3	1	0.589744	0.834008	0.601889			repeat3	1	0.517249	0.844763
	LPS
	0	1	5	10	ug/Ml
repeat1	1.085	0.862	0.489	0.397
repeat2	1.016	0.815	0.497	0.414
repeat3	0.988	0.8	0.498	0.447
repeat1	1	0.79447	0.450691	0.365899
repeat2	1	0.802165	0.489173	0.40748
repeat3	1	0.809717	0.504049	0.452429
