# Supplementary material for: LincRNA00612 inhibits apoptosis and inflammation in LPS-induced BEAS-2B cells via enhancing interaction between p-STAT3 and A2M promoter
Source: PeerJ. 2023 Mar 2;11:e14986. doi: 10.7717/peerj.14986 (PMC9985899; doi:10.7717/peerj.14986)
Supplement: Supplemental Information 4 [file peerj-11-14986-s004.xls]

## Sheet: Sheet1
	ELISA
	TNF-a
	vector	LPS	LPS+linc00612	LPS+linc00612+siA2M					TNF-a			vector	LPS	LPS+linc00612
	1.705	0.911	0.515	0.295	0.131	0.06	standard curve		1.046	0.501	0.342	0.18	0.104	0.056	standard curve
	0.29	1.163	0.377	0.538								0.22	0.376	0.246
	0.357	1.15	0.43	0.499								0.229	0.397	0.242
	0.388	1.201	0.425	0.549								0.229	0.394	0.319
	10.5311	51.8004	14.4039	21.7109								13.6508	26.6362	15.8278
	13.5089	51.1466	16.7892	19.9241								14.4049	28.3701	15.4932
	14.8973	53.7183	16.5633	22.2167								14.4049	28.1226	21.913
	52.6555	259.002	72.0194	108.554								68.2538	133.181	79.1392
	67.5444	255.733	83.9459	99.6207								72.0247	141.85	77.4662
	74.4866	268.591	82.8166	111.084								72.0247	140.613	109.565
	IL-6
	vector	LPS	LPS+linc00612	LPS+linc00612+siA2M					IL-6
	1.392	0.824	0.517	0.274	0.165	0.058	standard curve		0.822	0.538	0.344	0.187	0.121	0.056	standard curve
	0.372	0.679	0.393	0.539								0.246	0.429	0.291
	0.398	0.683	0.439	0.595								0.248	0.392	0.272
	0.405	0.782	0.48	0.543								0.254	0.449	0.299
	8.39298	18.2402	9.00907	13.5258								7.55753	17.1763	9.64784
	9.157	18.3804	10.3881	15.3665								7.64663	14.9923	8.74339
	9.36491	21.9483	11.6514	13.6553								7.91604	18.4073	10.0382
	41.9649	91.2011	45.0453	67.6289								37.7877	85.8816	48.2392
	45.785	91.9022	51.9405	76.8326								38.2331	74.9617	43.717
	46.8245	109.742	58.2569	68.2763								39.5802	92.0366	50.1911
standard curve
	1.705	0.911	0.515	0.295	0.131	0.06
	80	40	20	10	5	0			1.046	0.501	0.342	0.18	0.104	0.056
									80	40	20	10	5	0
	1.392	0.824	0.517	0.274	0.165	0.058
	48	24	12	6	3	0			0.822	0.538	0.344	0.187	0.121	0.056
									48	24	12	6	3	0
