# Supplementary material for: LincRNA00612 inhibits apoptosis and inflammation in LPS-induced BEAS-2B cells via enhancing interaction between p-STAT3 and A2M promoter
Source: PeerJ. 2023 Mar 2;11:e14986. doi: 10.7717/peerj.14986 (PMC9985899; doi:10.7717/peerj.14986)
Supplement: Supplemental Information 6 [file peerj-11-14986-s006.xls]

## Sheet: Sheet1
	repeat1	repeat2	repeat3
	caspase1	caspase2	caspase3		GAPDH1	GAPDH2	GAPDH3		caspase1/GAPDH1	caspase2/GAPDH2	caspase3/GAPDH3		repeat1	repeat2	repeat3
NC	10751.8	13977.3	12390.2		46329.5	46545.3	53213.7		0.232071	0.300294	0.232839		1	1	1
LPS	44570.5	36536.6	42557.8		56308.6	48475.4	48873		0.79154	0.753713	0.870784		3.41076	2.50992	3.73985
LPS+LINC00612	33377.9	29814.9	20617		58699.6	54535	48024.3		0.568622	0.546712	0.429304		2.4502	1.82059	1.84378
	repeat1	repeat2	repeat3
	A2M1	A2M2	A2M3		GAPDH1	GAPDH2	GAPDH3		A2M1/GAPDH1	A2M2/GAPDH2	A2M3/GAPDH3		repeat1	repeat2	repeat3
vector	14447.4	17394.9	17870.3		38292	38132.9	40665.2		0.377294	0.456166	0.439449		1	1	1
LINC00612	29385.1	31751.5	24576.7		30643.6	36000.7	35557.7		0.958932	0.881968	0.691179		2.5416	1.93344	1.57283
siNC	9180.46	11277.1	17337.7		36370.8	31663.4	34069.5		0.252413	0.356156	0.508892		1	1	1
siLINC00612	4802.2	3003.69	5796.37		27584.9	33642	33358.5		0.174088	0.089284	0.17376		0.689694	0.250688	0.341447
	repeat1	repeat2	repeat3
	A2M1	A2M2	A2M3		GAPDH1	GAPDH2	GAPDH3		A2M1/GAPDH1	A2M2/GAPDH2	A2M3/GAPDH3		repeat1	repeat2	repeat3
NC	55668.9	51036.7	67532.5		76146.4	72165	77075.5		0.731078	0.707222	0.876186		1	1	1
siSTAT3	29700.5	12899.3	30460		73179.5	74247.8	80557.8		0.405858	0.173734	0.378114		0.555151	0.245656	0.431545
	p-STAT3 1	p-STAT3 2	p-STAT3 3		t-STAT3 1	t-STAT3 2	t-STAT3 3		p-STAT3 1/GAPDH1	p-STAT3 2/GAPDH2	p-STAT3 3/GAPDH3		repeat1	repeat2	repeat3
NC	66541.5	72735.9	67442.4		55322.1	69520.5	71296.9		0.873863	1.00791	0.875018		1	1	1
siSTAT3	25509.9	48786.8	21657.1		47095.6	62374	59518.3		0.348594	0.657081	0.268839		0.398912	0.651924	0.307239
									T-STAT3 1/GAPDH1	T-STAT3 2/GAPDH2	T-STAT3 3/GAPDH3
									0.726523	0.963355	0.925027		1	1	1
									0.643563	0.840078	0.738828		0.885812	0.872034	0.798709
	repeat1	repeat2	repeat3
	caspase1	caspase2	caspase3		GAPDH1	GAPDH2	GAPDH3		caspase1/GAPDH1	caspase2/GAPDH2	caspase3/GAPDH3		repeat1	repeat2	repeat3
NC	12850.2	10617	15328.1		35710.7	33674.9	34246.2		0.359842	0.31528	0.447586		1	1	1
LPS	38761.7	30610.8	31037.1		38914.4	37939.6	39476		0.996076	0.80683	0.786228		2.76809	2.55909	1.75659
LPS+LINC00612	17800.3	10413.9	10283.6		40100.6	40055.4	40067.4		0.443891	0.259988	0.256658		1.23357	0.824625	0.573426
LPS+LINC00612+siA2M	29430.8	29246.7	30207.4		34849.7	42013.4	33118.4		0.844505	0.696127	0.912102		2.34688	2.20796	2.03782
	repeat1	repeat2	repeat3
	A2M1	A2M2	A2M3		GAPDH1	GAPDH2	GAPDH3		A2M1/GAPDH1	A2M2/GAPDH2	A2M3/GAPDH3		repeat1	repeat2	repeat3
NC	17475.2	13010.2	18230.7		38849.5	47076.6	50218.4		0.449818	0.276362	0.363028		1	1	1
LPS	40475.2	39719.9	42631.4		43325.9	51179.7	49538.5		0.934204	0.776087	0.860572		2.07685	2.80822	2.37054
LPS+LINC00612	24983.6	23698.6	28312.7		49734.8	46503	55477.3		0.502336	0.509614	0.510347		1.11675	1.84401	1.40581
