# Supplementary material for: LincRNA00612 inhibits apoptosis and inflammation in LPS-induced BEAS-2B cells via enhancing interaction between p-STAT3 and A2M promoter
Source: PeerJ. 2023 Mar 2;11:e14986. doi: 10.7717/peerj.14986 (PMC9985899; doi:10.7717/peerj.14986)
Supplement: Supplemental Information 7 [file peerj-11-14986-s007.xls]

## Sheet: Sheet1
repeat1	vector	LPS+vector	LPS+LINC00612	LPS+LINC00612+siA2M			vector	LPS+vector	LPS+LINC00612
Q2	2.05	15.4	5.62	8.95			4.5	18.4	6.57
Q3	0.96	4.27	1.68	2.67			0.75	8.92	1.61
%	3.01	19.67	7.3	11.62			5.25	27.32	8.18
	1	6.53488	2.42525	3.86047			1	5.20381	1.5581
repeat2
Q2	2.98	19.5	6.34	11.7			7.7	25.3	10.3
Q3	1.86	7.36	2.82	4.23			3.29	7.43	0.91
%	4.84	26.86	9.16	15.93			10.99	32.73	11.21
	1	5.54959	1.89256	3.29132			1	2.97816	1.02002
repeat3
Q2	2.44	19.3	7.72	12.6			3.27	17.6	9.34
Q3	1.11	5.39	2.78	4.05			0.44	5.41	0.84
%	3.55	24.69	10.5	16.65			3.71	23.01	10.18
	1	6.95493	2.95775	4.69014			1	6.20216	2.74394
	vector	LPS+vector	LPS+LINC00612	LPS+LINC00612+siA2M			vector	LPS+vector	LPS+LINC00612
repeat1	1	6.53488	2.42525	3.86047		repeat1	1	5.20381	1.5581
repeat2	1	4.0625	2.0575	3.59		repeat2	1	2.97816	1.02002
repeat3	1	6.95493	2.95775	4.69014		repeat3	1	6.20216	2.74394
